# Supplementary material for: Prediction of induced magnetism in 2D Ti2C based MXenes by manipulating the mixed surface functionalization and metal substitution computed by xTB model Hamiltonian of the DFTB method
Source: Royal Society of Chemistry journal article supplement (doi:10.1039/d3cp05665a), 2024-01-01
Supplement: d3cp05665a1.pdf [file d3cp05665a1.pdf]

*Electronic Supplementary Information to*  
**Prediction of induced magnetism in 2D Ti<sub>2</sub>C based MXene  
by manipulating the mixed surface functionalization and  
metal substitution computed by xTB model Hamiltonian  
of the DFTB method**

Taoufik Sakhraoui \* and František Karlický

Department of Physics, Faculty of Science, University of Ostrava, 701 03 Ostrava, Czech Republic

**Contents**

|          |                                                                                                           |          |
|----------|-----------------------------------------------------------------------------------------------------------|----------|
| <b>1</b> | <b>Energy difference by DFT</b>                                                                           | <b>2</b> |
| <b>2</b> | <b>Substitution of Ti by Sc in mixed surface termination (Ti<sub>2</sub>CA<sub>x</sub>B<sub>y</sub>).</b> | <b>2</b> |
| <b>3</b> | <b>Substitution of Ti by Sc in 5×5×1-Ti<sub>2</sub>CO<sub>2</sub></b>                                     | <b>3</b> |

---

\* taoufik.sakhraoui@osu.cz

## 1 Energy difference by DFT

Density functional theory (DFT) calculations were carried out using Quantum espresso Package [1, 2]. The electronic exchange-correlation interaction was described by the functional of Perdew, Burke, and Ernzerhof (PBE) within the generalized gradient approximation (GGA) [3]. Energy and force convergence criteria of  $10^{-4}$  a.u and  $2 \times 10^{-5}$  a.u, respectively, were used in all calculations, along with a kinetic energy cutoff of 80 Ry to expand the wave functions, a  $6 \times 6 \times 1$  Monkhorst-Pack k-point grid [4] and a Marzari-Vanderbilt smearing width [5] of 0.05 Ry.

Table S1: PBE calculations of the magnetic energy difference ( $E_{\text{FM,AFMj}(j=1,2,3)} - E_{\text{FM}}$ ) in meV and the corresponding magnetic moments in  $\mu_B/\text{cell}$  of mixed  $\text{Ti}_2\text{CA}_x\text{B}_y$  (A, B = O, F, OH). The ground state energy is marked in bold.

| Initial magnetic state                        | Magnetic energy difference |        |               |        | Total magnetic moments |      |                    |             |
|-----------------------------------------------|----------------------------|--------|---------------|--------|------------------------|------|--------------------|-------------|
|                                               | FM                         | AFM1   | AFM2          | AFM3   | FM                     | AFM1 | AFM2               | AFM3        |
| $\text{Ti}_2\text{CO}_1(\text{OH})_1$         | <b>0.00</b>                | 16.30  | 8.10          | 8.10   | <b>1.05</b>            | 1.00 | 0.07               | 0.02        |
| $\text{Ti}_2\text{CO}_{1.5}(\text{OH})_{0.5}$ | <b>0.00</b>                | 0.00   | 0.00          | 0.00   | <b>0.97</b>            | 0.97 | 0.97               | 0.97        |
| $\text{Ti}_2\text{CO}_{0.5}(\text{OH})_{1.5}$ | 0.00                       | -10.80 | <b>-12.20</b> | -2.70  | 1.69                   | 0.36 | <b>1.31</b>        | 0.05        |
| $\text{Ti}_2\text{CO}_1\text{F}_1$            | <b>0.00</b>                | 0.00   | 38.10         | 38.10  | <b>1.96</b>            | 1.96 | 0.01               | 0.02        |
| $\text{Ti}_2\text{CO}_{1.5}\text{F}_{0.5}$    | <b>0.00</b>                | 0.00   | 0.00          | 0.00   | <b>1.00</b>            | 1.00 | 1.00               | 1.00        |
| $\text{Ti}_2\text{CO}_{0.5}\text{F}_{1.5}$    | <b>0.00</b>                | 80.30  | 32.60         | 5.40   | <b>2.92</b>            | 0.60 | 1.82               | 0.88        |
| $\text{Ti}_2\text{CF}_1(\text{OH})_1$         | 0.00                       | 34.00  | <b>-59.80</b> | -34.00 | 2.80                   | 0.72 | <b>0.00 (AFM2)</b> | 0.00 (AFM3) |
| $\text{Ti}_2\text{CF}_{1.5}(\text{OH})_{0.5}$ | 0.00                       | 79.00  | <b>-27.20</b> | 69.40  | 3.85                   | 0.23 | <b>0.00 (AFM2)</b> | 0.16        |
| $\text{Ti}_2\text{CF}_{0.5}(\text{OH})_{1.5}$ | <b>0.00</b>                | 47.60  | 95.20         | 39.30  | <b>3.31</b>            | 0.94 | 0.63               | 0.50        |

## 2 Substitution of Ti by Sc in mixed surface termination ( $\text{Ti}_2\text{CA}_x\text{B}_y$ ).

Table S2: Absolute value of the local magnetic moments (in  $\mu_B$ ) in  $\text{Ti}_2\text{CA}_x\text{B}_y$ .

|                                               | Ti           | C            |
|-----------------------------------------------|--------------|--------------|
| $\text{Ti}_2\text{CO}_{1.0}(\text{OH})_{1.0}$ | 0.40 to 1.13 | 0.41 to 0.50 |
| $\text{Ti}_2\text{CO}_{1.5}(\text{OH})_{0.5}$ | 0.02 to 1.13 | 0.23 to 0.27 |
| $\text{Ti}_2\text{CO}_{0.5}(\text{OH})_{1.5}$ | 0.41 to 2.00 | 0.27 to 0.43 |
| $\text{Ti}_2\text{CO}_{1.0}\text{F}_{1.0}$    | 0.51 to 0.96 | 0.34 to 0.40 |
| $\text{Ti}_2\text{CO}_{1.5}\text{F}_{0.5}$    | 0.00 to 1.01 | 0.18 to 0.22 |
| $\text{Ti}_2\text{CO}_{0.5}\text{F}_{1.5}$    | 0.40 to 1.45 | 0.44 to 0.46 |
| $\text{Ti}_2\text{CF}_{1.0}(\text{OH})_{1.0}$ | 1.50 to 1.70 | 0.00         |
| $\text{Ti}_2\text{CF}_{1.5}(\text{OH})_{0.5}$ | 1.40 to 1.70 | 0.00         |
| $\text{Ti}_2\text{CF}_{0.5}(\text{OH})_{1.5}$ | 1.26 to 1.60 | 0.71 to 0.74 |

Table S3: Absolute value of the local magnetic moments (in  $\mu_B$ ) in Ti substituted by Sc in  $Ti_2CA_xB_y$ .

|                                | Ti           | C            | Sc   |
|--------------------------------|--------------|--------------|------|
| Sc in $Ti_2CO_{1.0}(OH)_{1.0}$ | 0.32 to 1.52 | 0.42 to 0.60 | 0.10 |
| Sc in $Ti_2CO_{1.5}(OH)_{0.5}$ | 0.00 to 1.48 | 0.24 to 0.30 | 0.02 |
| Sc in $Ti_2CO_{0.5}(OH)_{1.5}$ | 0.10 to 1.71 | 0.60 to 0.70 | 0.13 |
| Sc in $Ti_2CO_{1.0}F_{1.0}$    | 0.47 to 1.25 | 0.31 to 0.43 | 0.08 |
| Sc in $Ti_2CO_{1.5}F_{0.5}$    | 0.00 to 1.30 | 0.12 to 0.24 | 0.02 |
| Sc in $Ti_2CO_{0.5}F_{1.5}$    | 0.61 to 1.53 | 0.45 to 0.50 | 0.11 |
| Sc in $Ti_2CF_{1.0}(OH)_{1.0}$ | 1.28 to 1.83 | 0.66 to 0.75 | 0.18 |
| Sc in $Ti_2CF_{1.5}(OH)_{0.5}$ | 1.17 to 1.71 | 0.60 to 0.64 | 0.14 |
| Sc in $Ti_2CF_{0.5}(OH)_{1.5}$ | 1.10 to 1.71 | 0.72 to 0.79 | 0.20 |

### 3 Substitution of Ti by Sc in $5 \times 5 \times 1$ - $Ti_2CO_2$

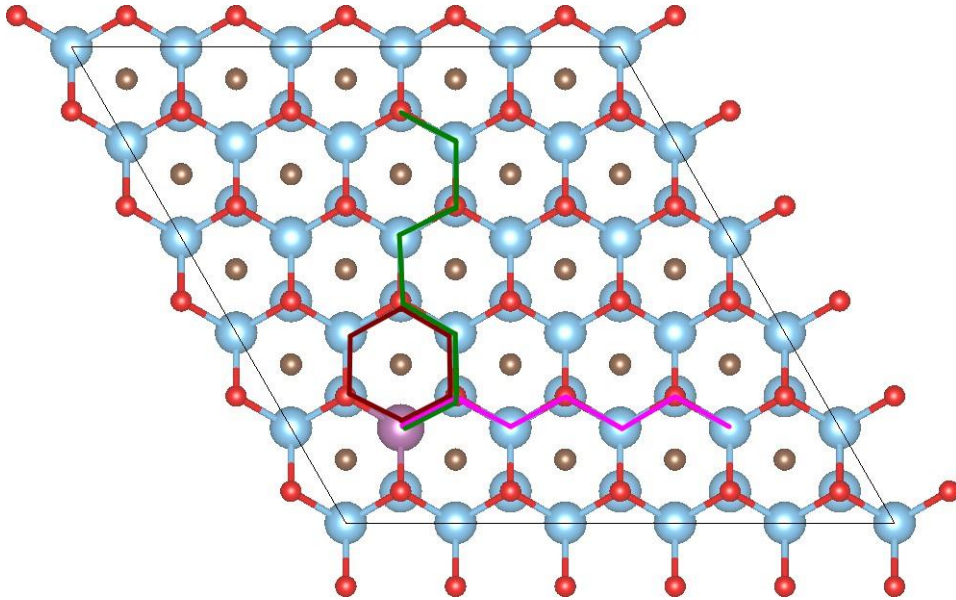

Figure S1: Structure of Ti substituted by Sc in  $5 \times 5 \times 1$ - $Ti_2CO_2$  following the Zigzag, Armchair and Cluster directions.

Table S4: Total energies of n Ti atoms substituted by n Sc atoms in  $5 \times 5 \times 1$ - $Ti_2CO_2$  following the Zigzag, Armchair, and Cluster directions. 1, 2, and 3 Sc in the cell have the same positions for all the considered directions, and 4Sc atoms following the cluster are the same as in the armchair direction (See Figure S1).

|     | Armchair   | Zigzag     | Cluster    |
|-----|------------|------------|------------|
| 1Sc | -9637.2446 | –          | –          |
| 2Sc | -9630.9588 | –          | –          |
| 3Sc | -9624.3116 | –          | –          |
| 4Sc | -9617.4778 | -9617.6027 | –          |
| 5Sc | -9610.3680 | -9610.3667 | -9610.2819 |
| 6Sc | -9603.1222 | -9603.1358 | -9602.8932 |
| 7Sc | -9596.1266 | -9595.8059 | –          |

## References

- [1] P Giannozzi, S Baroni, N Bonini, M Calandra, R Car, C Cavazzoni, D Ceresoli, G L Chiarotti, M Cococcioni, I Dabo, A Dal Corso, S de Gironcoli, S Fabris, G Fratesi, R Gebauer, U Gerstmann, C Gougoussis, A Kokalj, M Lazzeri, L Martin-Samos, N Marzari, F Mauri, R Mazzarello, S Paolini, A Pasquarello, L Paulatto, C Sbraccia, S Scandolo, G Sclauzero, A P Seitsonen, A Smogunov, P Umari, and R M Wentzcovitch. Quantum espresso: a modular and open-source software project for quantum simulations of materials. *Journal of Physics: Condensed Matter*, 21:395502, 2009.
- [2] P Giannozzi, O Andreussi, T Brumme, O Bunau, M Buongiorno Nardelli, M Calandra, R Car, C Cavazzoni, D Ceresoli, M Cococcioni, N Colonna, I Carnimeo, A Dal Corso, S de Gironcoli, P Delugas, R A DiStasio, A Ferretti, A Floris, G Fratesi, G Fugallo, R Gebauer, U Gerstmann, F Giustino, T Gorni, J Jia, M Kawamura, H-Y Ko, A Kokalj, E Küçükbenli, M Lazzeri, M Marsili, N Marzari, F Mauri, N L Nguyen, H-V Nguyen, A Otero de-la Roza, L Paulatto, S Poncé, D Rocca, R Sabatini, B Santra, M Schlipf, A P Seitsonen, A Smogunov, I Timrov, T Thonhauser, P Umari, N Vast, X Wu, and S Baroni. Advanced capabilities for materials modelling with quantum espresso. *Journal of Physics: Condensed Matter*, 29:465901, 2017.
- [3] J P Perdew, K Burke, and M Ernzerhof. Generalized gradient approximation made simple. *Phys. Rev. Lett.*, 77:3865–3868, 1996.
- [4] H J Monkhorst and J D Pack. Special points for brillouin-zone integrations. *Phys. Rev. B*, 13:5188– 5192, 1976.
- [5] P L Silvestrelli, N Marzari, D Vanderbilt, and M Parrinello. Maximally-localized wannier functions for disordered systems: Application to amorphous silicon. *Solid State Communications*, 107:7–11, 1998.
